# Supplementary material
Source: PubMed Central journal article supplement (PMC1965554)
Supplement: pnas_0703178104_1.pdf [file pnas_0703178104_1.pdf]

**Table 2. Cse4-GFP localization in Scm3-depleted cells**

|                  | Nacodazole* |               | Asynchronous†        |               |
|------------------|-------------|---------------|----------------------|---------------|
|                  | Control     | Scm3-depleted | Control              | Scm3-depleted |
| Fields           | 3           | 4             | 1                    | 4             |
| Cells Scored‡    | 32          | 38            | 37                   | 33            |
| Positive         | 31          | 15            | 31                   | 19            |
| Negative         | 1           | 23            | 6                    | 14            |
| $\chi^2$ (Yates) | 395         |               | 14.8                 |               |
| <i>P</i>         | $< 10^{-4}$ |               | $< 5 \times 10^{-3}$ |               |

\*Strain R421 cells were arrested with 20  $\mu\text{g/ml}$  nacodazole in YEPD medium and released into complete minimal medium containing (Scm3-depleted) or not containing (control) 0.5 mM  $\text{CuSO}_4$ . After 180 min, samples were taken and fixed for fluorescence microscopy.

†An early log-phase culture of strain R421 growing in complete minimal medium was divided in half, and  $\text{CuSO}_4$  was added to one portion to a concentration of 0.5 mM. After an additional 180 min incubation, samples were collected and fixed for fluorescence microscopy.

‡Using fluorescence micrographs, cells were scored for the presence of a distinct fluorescent “dot” (or two dots in the case of budded cells) located at the periphery of the major DAPI-staining mass.
